# Supplementary material for: Enzyme-mediated depletion of serum l-Met abrogates prostate cancer growth via multiple mechanisms without evidence of systemic toxicity
Source: PubMed Central journal article supplement — Proc Natl Acad Sci U S A. 2020 May 20;117(23):13000–11. doi: 10.1073/pnas.1917362117 (PMC7293657; doi:10.1073/pnas.1917362117), 2020-05-20
Supplement: pnas.1917362117.sapp.pdf [file pnas.1917362117.sapp.pdf]

# **Enzyme-Mediated Depletion of Serum L-Met Abrogates Prostate Cancer Growth via Multiple Mechanisms without Evidence of Systemic Toxicity in Mice**

## **Appendix**

Figure S1

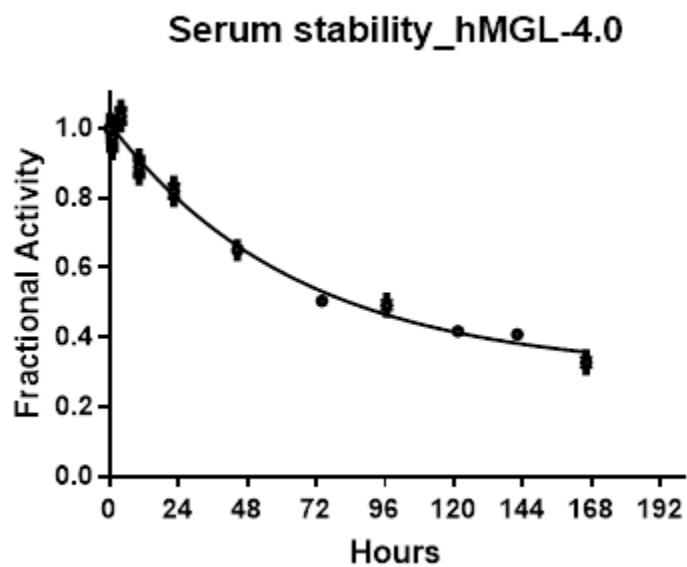

**Fig. S1: Assessment of hMGL-4.0 catalytic stability.** PEGylated hMGL-4.0 was incubated in pooled human serum at 37 °C and activity was determined as a function of time. An activity half-life was calculated to be  $83 \pm 2$  hrs.

**Figure S2**

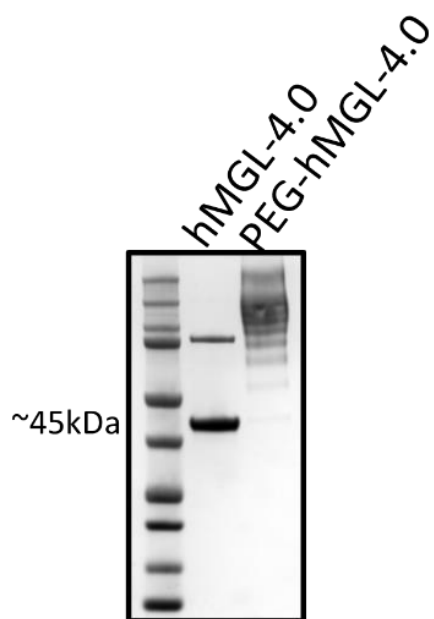

**Fig. S2: PEGylation analysis of hMGL-4.0.** SDS-PAGE gel of purified hMGL-4.0 (lane 1) and hMGL-4.0 after PEGylation with 100 fold molar excess of methoxy PEG succinimidyl carboxymethyl ester, MW 5000 Da (lane 2).

**Table S1**

| <b>Data Collection</b>                  |                                                                |
|-----------------------------------------|----------------------------------------------------------------|
| <b>Wavelength (Å)</b>                   | 1.03321                                                        |
| <b>Resolution range (Å)</b>             | 50-2.73 (2.78-2.73) <sup>1</sup>                               |
| <b>Space Group</b>                      | P2 <sub>1</sub> 2 <sub>1</sub>                                 |
| <b>Unit cell dimensions</b>             |                                                                |
| a, b, c (Å)                             | 113.6, 164.3, 181.7                                            |
| α, β, γ (°)                             | 90, 90, 90                                                     |
| <b>Total Reflections</b>                | 572371                                                         |
| <b>Unique reflections</b>               | 91209(4400)                                                    |
| <b>Multiplicity</b>                     | 6.3(5.7)                                                       |
| <b>Completeness (%)</b>                 | 99.4(97.6)                                                     |
| <b>Mean I/sigma (I)</b>                 | 13.109(2.260)                                                  |
| <b>R<sub>merge</sub></b>                | 0.129(0.657)                                                   |
| <b>Refinement</b>                       |                                                                |
| <b>R<sub>work</sub></b>                 | 0.1806                                                         |
| <b>R<sub>free</sub></b>                 | 0.2290 <sup>2</sup>                                            |
| <b>Number of non-hydrogen atoms</b>     | 24368                                                          |
| macromolecules                          | 23852                                                          |
| ligands(PLP)                            | 120                                                            |
| solvent                                 | 396                                                            |
| <b>Protein residues</b>                 | 3093                                                           |
| <b>RMSD (bonds) (Å)</b>                 | 0.004                                                          |
| <b>RMSD (angles) (°)</b>                | 0.677                                                          |
| <b>Ramachandran Favored (%)</b>         | 96.7                                                           |
| <b>Ramachandran Allowed (%)</b>         | 3.3                                                            |
| <b>Ramachandran outliers (%)</b>        | 0.0                                                            |
| <b>Average B-factor (Å<sup>2</sup>)</b> | 43.1                                                           |
| macromolecules                          | 43.3                                                           |
| ligands(PLP)                            | 44.1                                                           |
| solvent                                 | 33.0                                                           |
| <b>MolProbity score</b>                 | 1.59 <sup>3</sup> (100 <sup>th</sup> percentile <sup>4</sup> ) |

<sup>1</sup>Statistics for the highest resolution shell is shown in parenthesis

<sup>2</sup>R<sub>free</sub> was calculated by keeping aside 5% of the reflections as an unbiased test set.

<sup>3</sup>The MolProbity score represents a combination of the clashscore, rotamer, and Ramachandran evaluations.

<sup>4</sup>100<sup>th</sup> percentile represents the best structure of comparable resolution whereas 0<sup>th</sup> percentile indicates the worst.

**Figure S3**

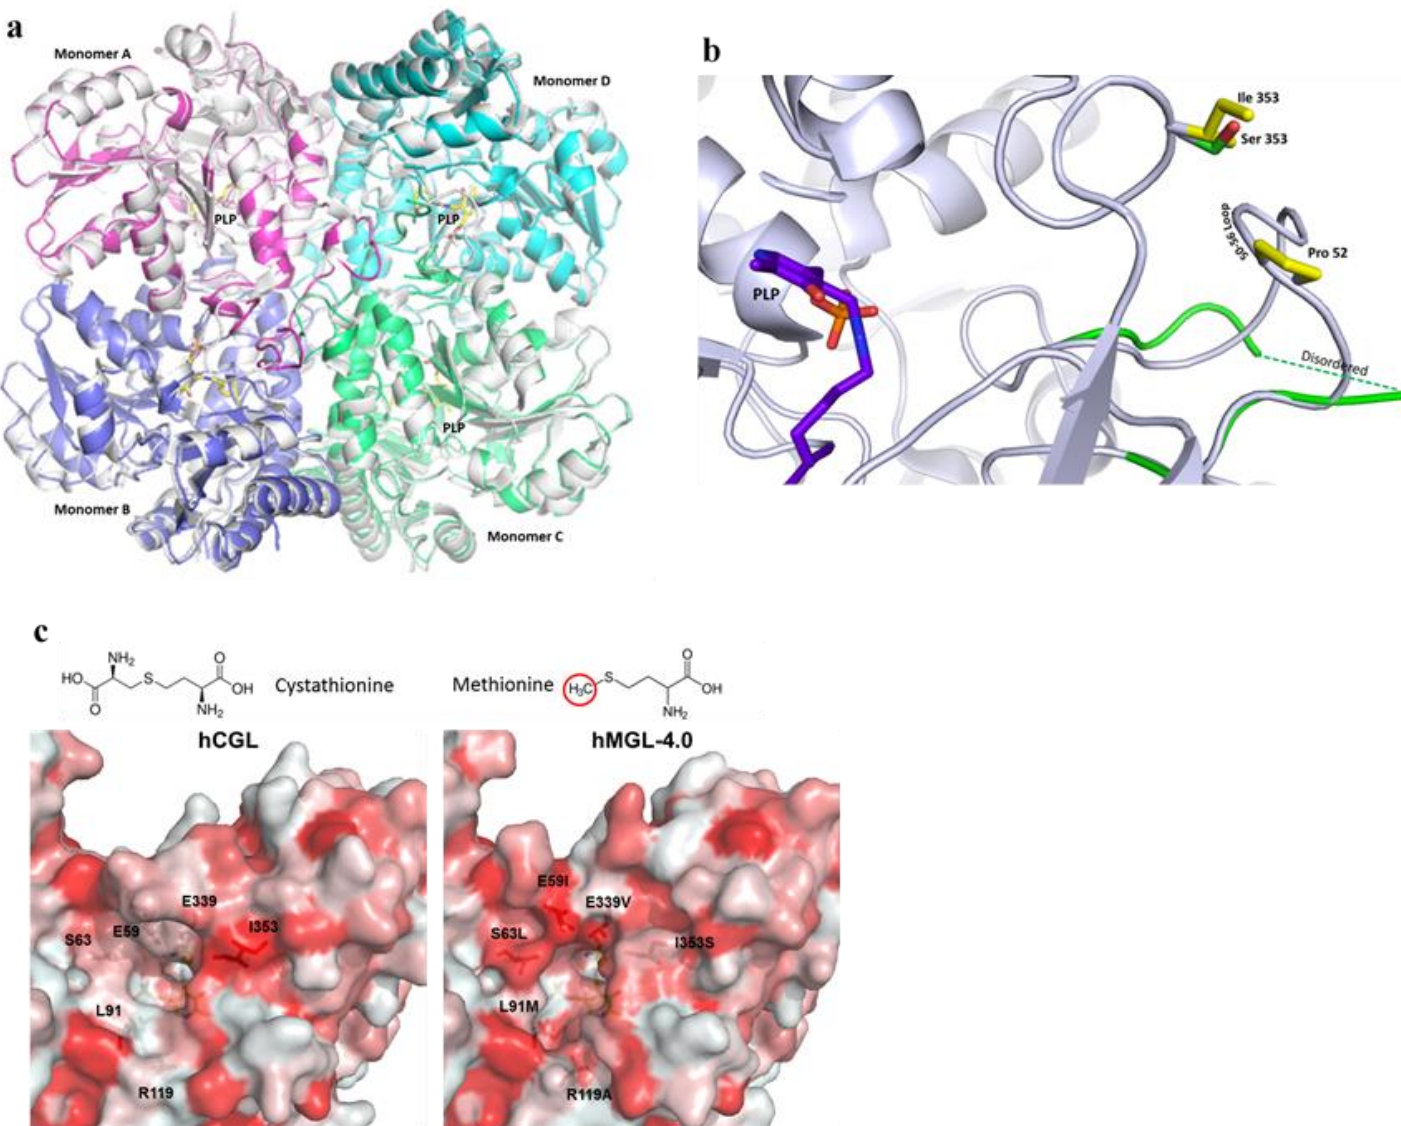

**Fig. S3. Structural analyses of hMGL-4.0.**

**(a)** Superimposition of the hMGL-4.0 (pdb code: 6OVG) shown in colors with the wild type hCGL shown in white (pdb code: 2NMP). PLP is shown in stick with carbon atoms colored yellow. **(b)** Residues Ile 353 and Pro 52 (shown as yellow sticks) form hydrophobic interactions in the wild-type hCGL. In hMGL-4.0, the I353S mutation (shown in green) destabilizes this interaction leading to a disordering of the 50-56 amino acid loop. The PLP cofactor is shown as sticks with carbon atoms colored purple. **(c)** The comparison of wildtype and hMGL-4.0. A hydrophobicity map of hCGL (PDB: 2NMP) and hMGL-4.0 (pdb code: 6OVG). The E59I, S63L and E339V mutations increase the hydrophobicity of hMGL-4.0 (right) as compared to hCGL facilitating utilization of L-Met as a substrate (Hydrophobic regions indicated in red).

**Figure S4**

**HMVP2 allograft**

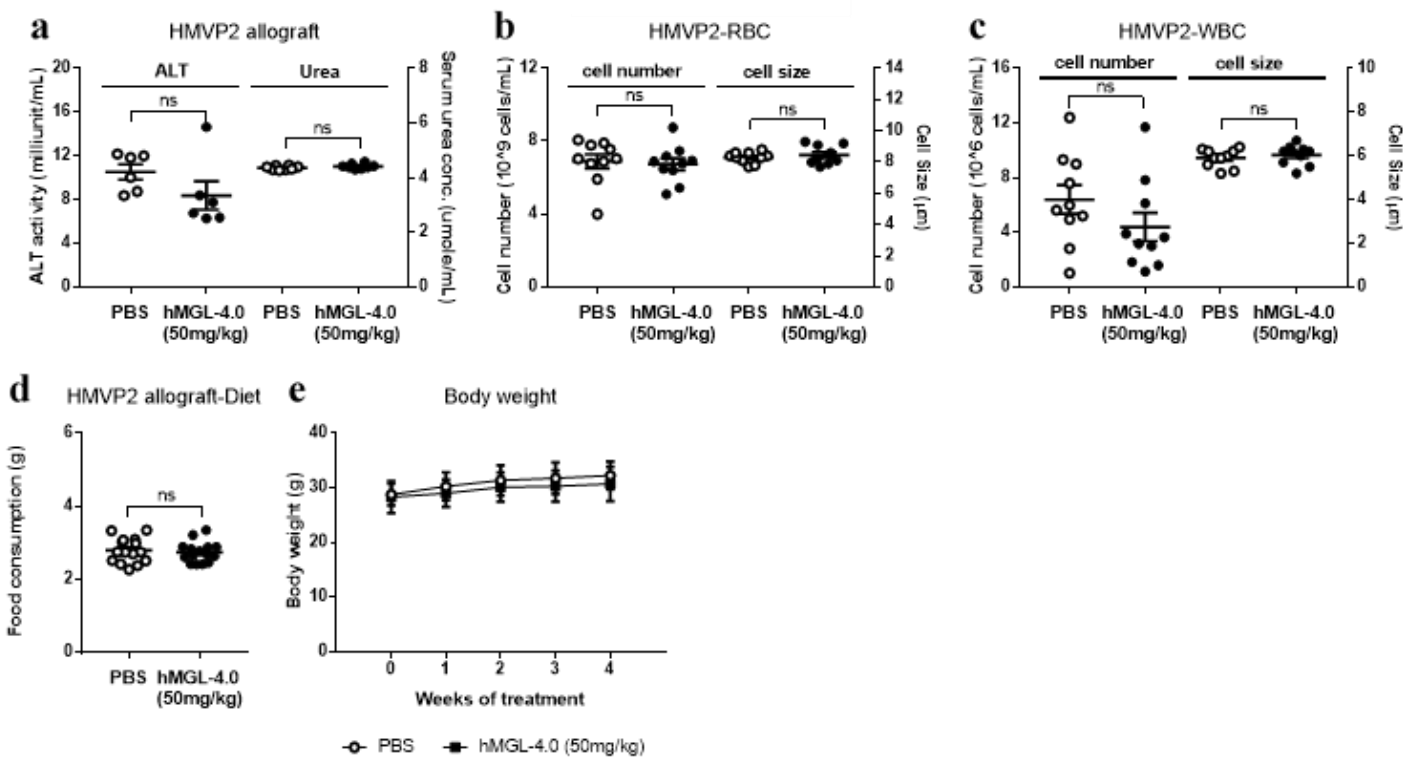

**Fig. S4. Toxicological assessment of mice bearing HMVP2 tumors.** (a) Renal function was assessed by monitoring serum urea concentrations, and liver toxicity was assessed by serum alanine transaminase (ALT) activity following termination of the HMVP2 allograft studies (ALT group, n = 6 ; urea group, n = 8). (b, c) Effect of hMGL-4.0 treatment in FVB/N mice on blood cell count and size, following termination of the HMVP2 allograft studies: (b) red blood cell (RBC) number and size; (c) white blood cell (WBC) count and size (n = 10 per group). (d, e) Quantitation of average (d) food consumption (n=15) per mouse per day and (e) body weight (n=10) for each treatment group following treatment with hMGL-4.0 or controls in male FVB/N mice bearing allograft tumors of HMVP2 PCa spheroids. Throughout, data are expressed as mean  $\pm$  s.e.m. and were found to be not significant; two-tailed Student's t-test.

**Figure S5**

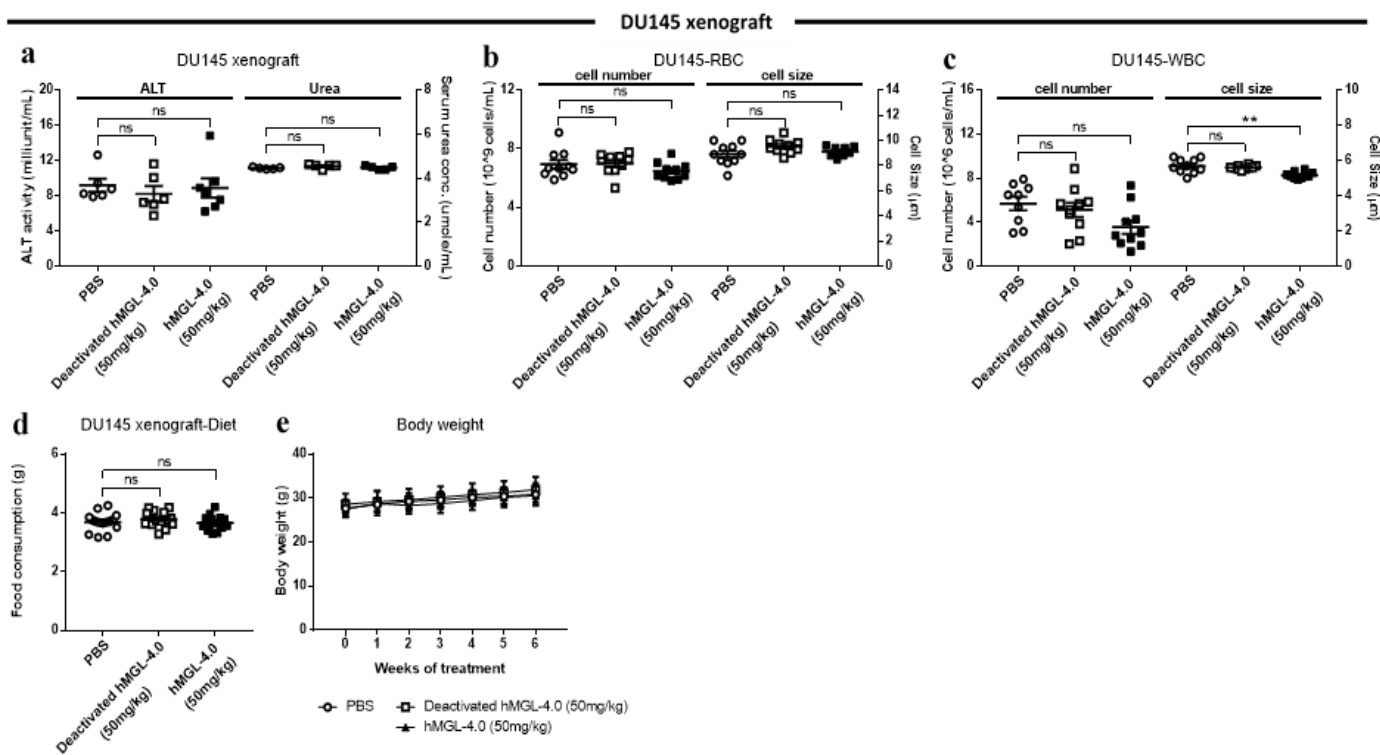

**Fig. S5. Toxicological assessment of mice bearing DU145 tumors.**

(a) Renal function was assessed by monitoring serum urea concentrations and liver toxicity was assessed by serum alanine transaminase (ALT) activity at sacrifice (ALT group,  $n = 6$  or  $8$ ; urea group,  $n = 5$ ) following treatment with hMGL-4.0 or control, deactivated enzyme in male nude mice bearing DU145 PCa xenografts. (b, c) Effect of hMGL-4.0 treatment on blood cell count and size, following termination of the DU145 xenograft studies: (b) red blood cell (RBC) number and size; (c) white blood cell (WBC) count and size ( $n = 10$  per group). (d, e) Quantitation of average (d) food consumption ( $n=15$ ) per mouse per day and (e) body weight ( $n=10$  or  $9$ ). Throughout, data are expressed as mean  $\pm$  s.e.m.; One-way ANOVA (a-d) or two-way ANOVA (e) followed by Bonferroni's multiple comparison test. \*\* $P < 0.01$ .



Figure S6

H&E Liver

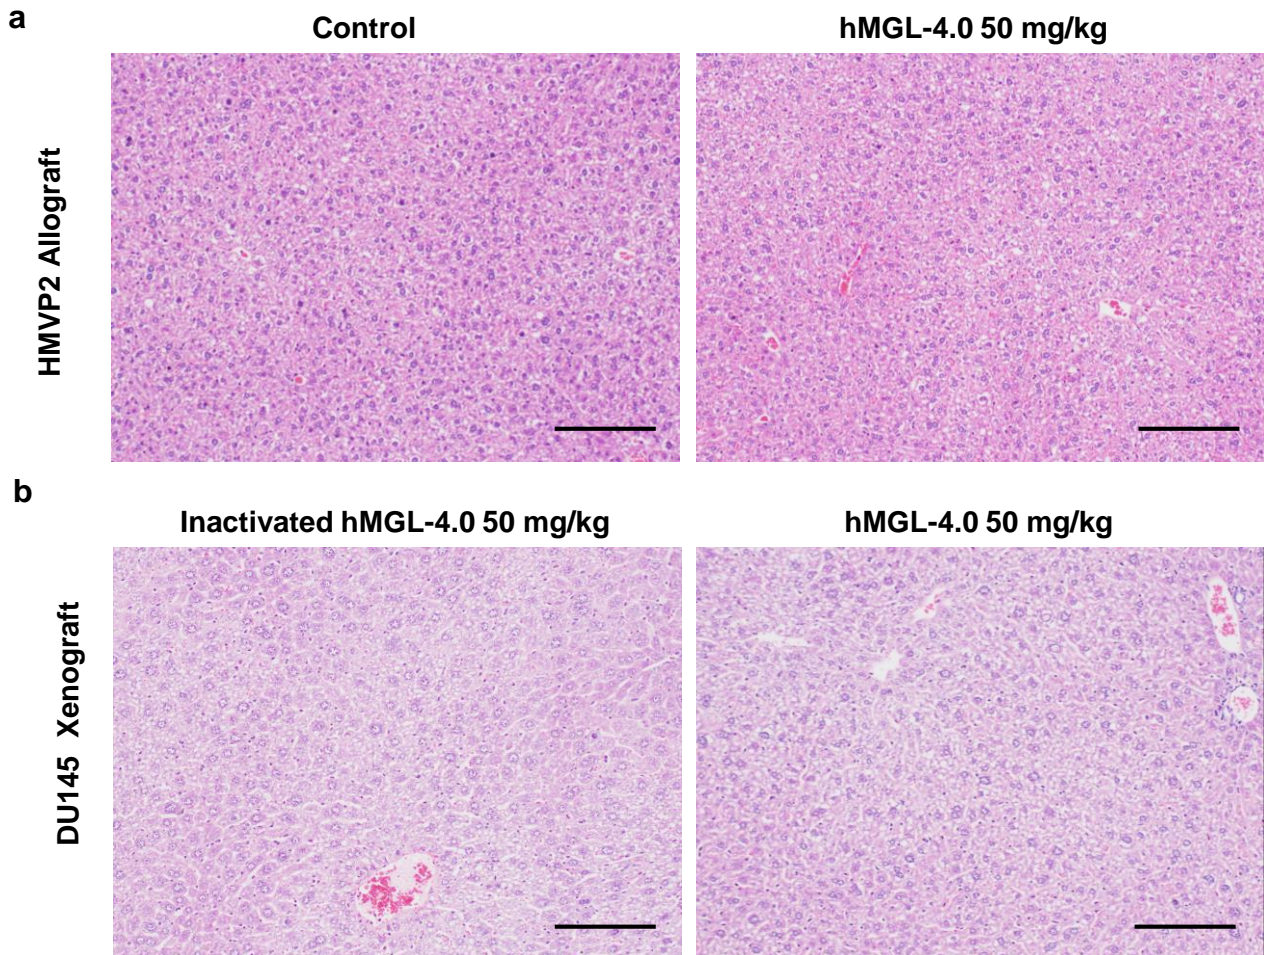

**Fig. S6. Histology of liver section of mice bearing HMVP2 and DU145 tumors.**

H&E staining of representative liver section of (a) FBV/N mice bearing HMVP2 allograft or (b) athymic nude mice bearing DU145 xenograft and treated with control (either PBS or heat inactivated hMGL-4.0) or hMGL-4.0 50 mg/kg. Scale bar 100  $\mu$ M.



**Figure S7**

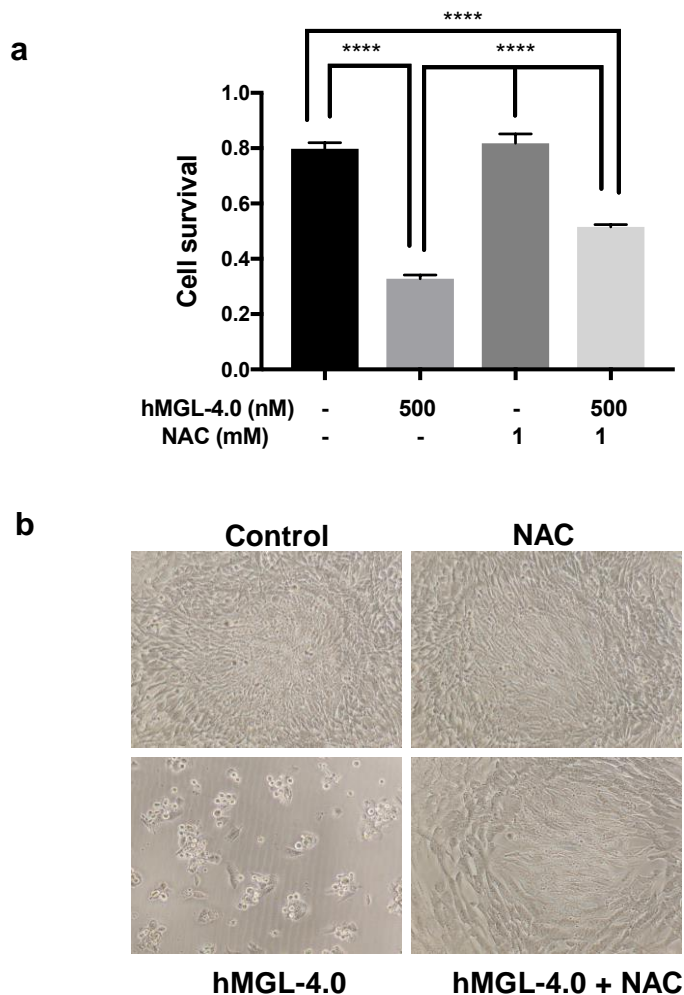

**Fig. S7. NAC partially rescues the inhibition of cell survival by hMGL-4.0.**

(a) HMVP2 cells were treated with hMGL-4.0, NAC or their combination and cell survival was measured by crystal violet assay. (b) Representative images of cells from (a). Data are expressed as mean  $\pm$  s.e.m. One-way ANOVA followed by Bonferroni's multiple comparison test. \*\*\*\*  $P < 0.0001$ .

Figure S8

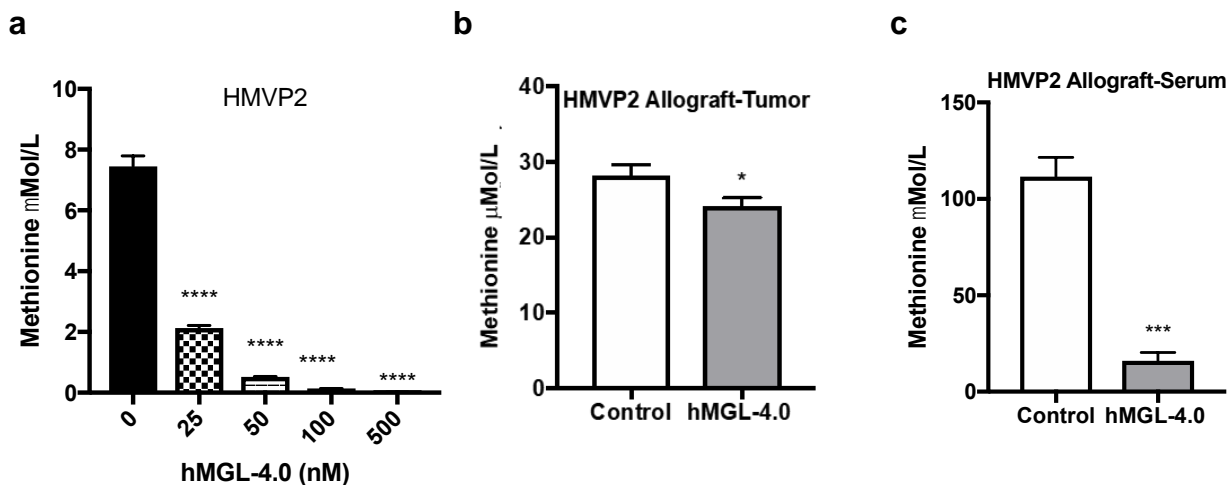

**Fig. S8. Absolute L-Met levels.** (a) Absolute concentrations of methionine in HMVP2 cells treated *in vitro* with indicated concentrations of hMGL-4.0 (n = 3 cell culture replicates); (b) L-Met levels in HMVP2 tumor tissue (n=8 or 9 for control and hMGL-4.0 50 mg/kg treated tumor tissues ) and (c) in serum (n=5) of HMVP2 tumor bearing mice treated with PEG-hMGL-4.0. Data are expressed as mean  $\pm$  s.e.m. One-way ANOVA followed by Bonferroni's multiple comparison test (a), Student t-test (b, c) . \*P < 0.05, \*\*\*P < 0.001, \*\*\*\* P < 0.0001.

**Figure S9**

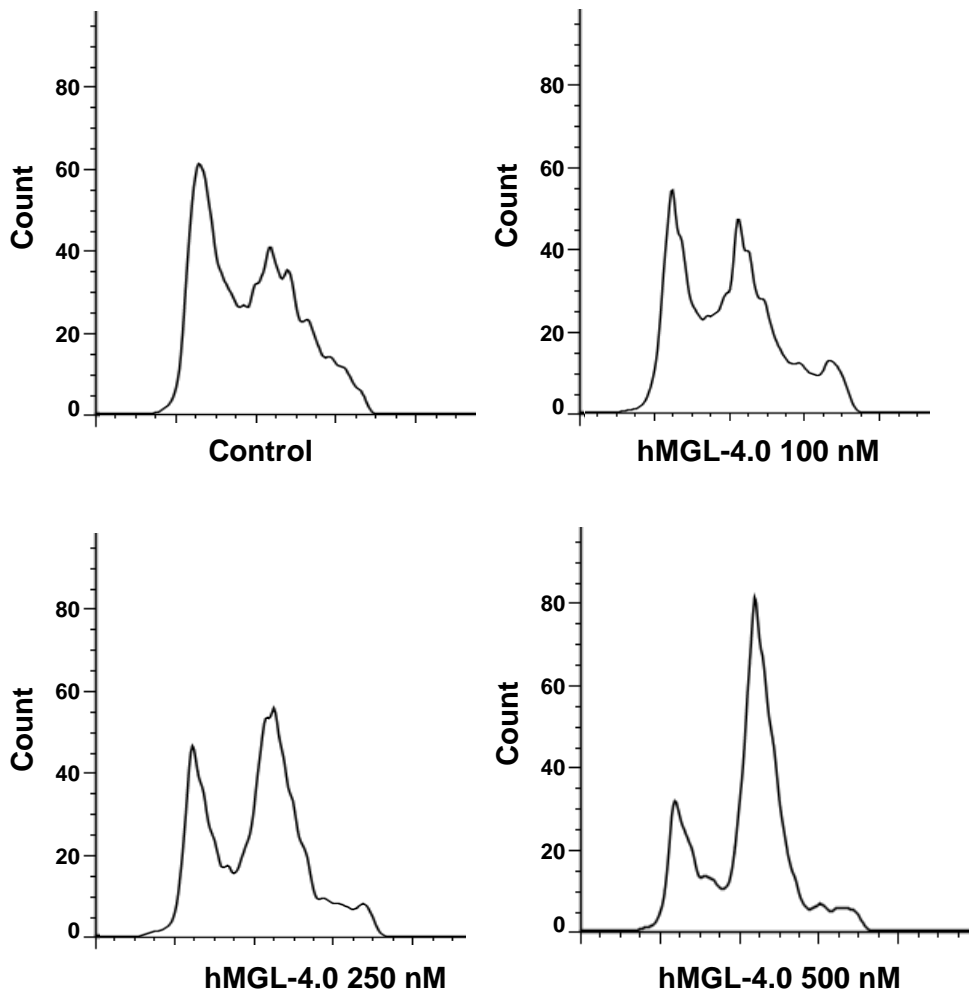

**Fig. S9. Effect of hMGL-4.0 treatment in cell cycle distribution.**

HMVP2 cells were treated with indicated concentrations of hMGL-4.0 for 24h and Cell-cycle phase distribution was measured by guava based flow cytometry.

**Figure S10**

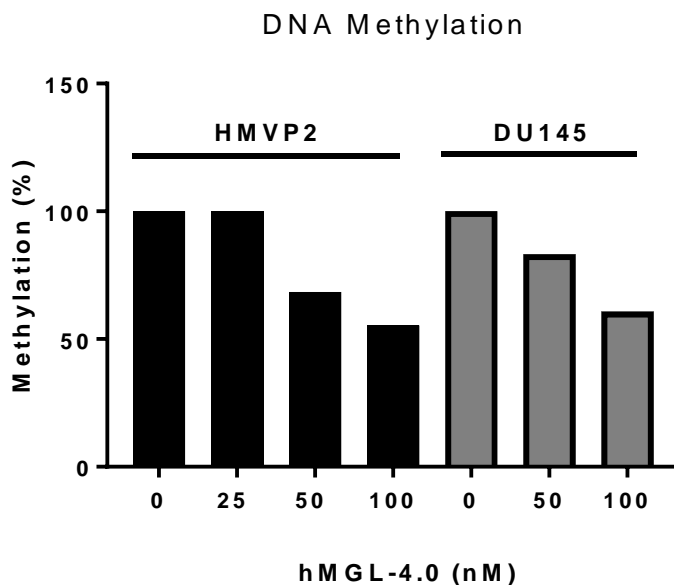

**Fig. S10. Effect of hMGL-4.0 on DNA methylation in PCa cells.** HMVP2 and DU145 PCa cells were treated with indicated concentrations of hMGL-4.0 for 24 h and global DNA methylation status was measured colorimetrically by ELISA-like format with a commercially available DNA methylation kit (EPIGENTEK). n = 2 cell culture replicates.

## Figure S11

### a. Methionine pathway

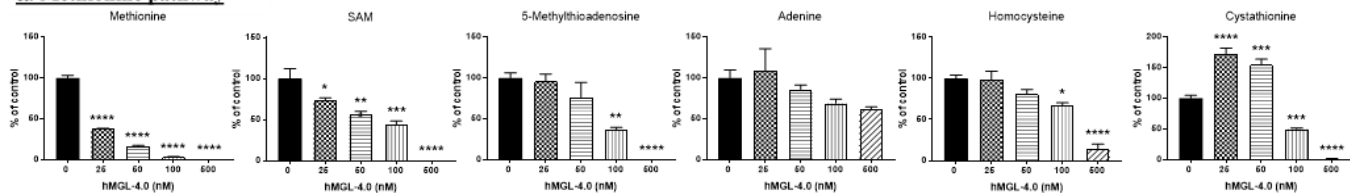

### b. Polyamine pathway

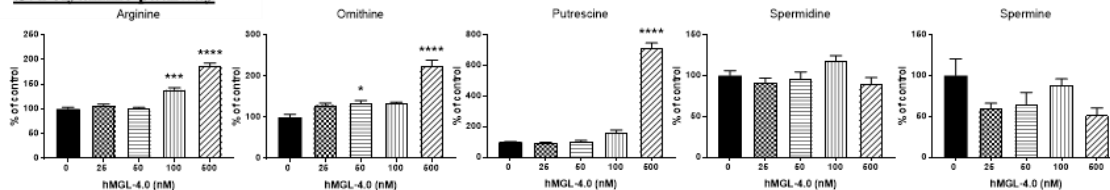

### c. Cysteine pathway

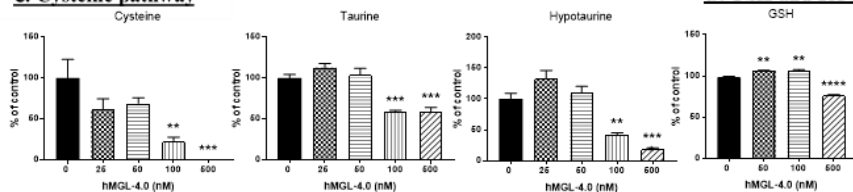

### d. GSH and ROS

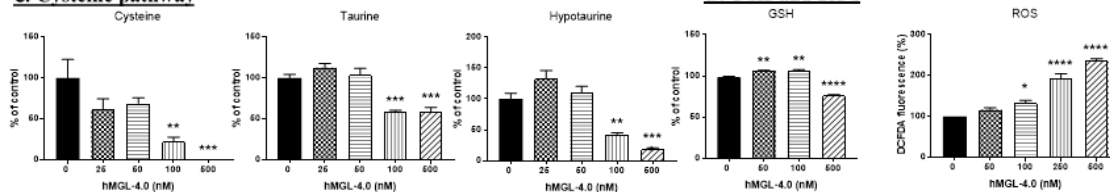

## Fig. S11. Metabolomic analyses of 22Rv1 PCa cells following treatment with hMGL-4.0.

(a-d) Relative concentrations of methionine and non-methionine intracellular metabolites in 22Rv1 PCa cells as a function of increasing concentrations of hMGL-4.0 after 24 h treatment as determined by mass spectrometry ( $n = 3$ ). Measured metabolites in: (a) methionine pathway, (b) polyamine pathway, (c) cysteine pathway, and (d) Relative concentrations of GSH and ROS in 22Rv1 PCa cells as a function of increasing concentration hMGL-4.0. GSH level was measured at the 24 h time point by spectrophotometric method ( $n=3$  cell culture replicates at each dose); Cellular ROS levels were measured by 2',7'-Dichlorofluorescein diacetate (DCFDA) fluorescence 4 h post-treatment (data are from 3 independent experiments). All data are expressed as mean  $\pm$  s.e.m. One-way ANOVA followed by Bonferroni's multiple comparison test was used for statistical analyses. \* $P < 0.05$ ; \*\* $P < 0.01$ ; \*\*\*  $P < 0.001$ ; \*\*\*\*  $P < 0.0001$ .

**Figure S12**

**22Rv1 signaling pathway**

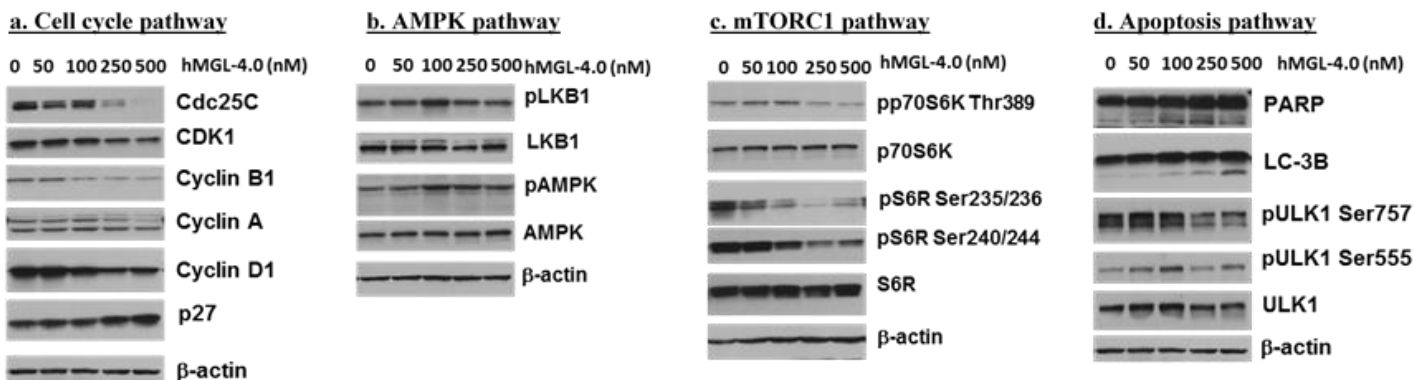

**Fig. S12. Signaling pathway analyses of 22Rv1 PCa cells treated with hMGL-4.0.** (a-d) 22Rv1 PCa cells were treated with indicated concentrations of hMGL-4.0 for 24 h. Metabolic stress markers and cell cycle regulatory proteins were measured by immunoblot. Immunoblots were performed at least three times with β-actin controls for each experiment.

**Figure S13**

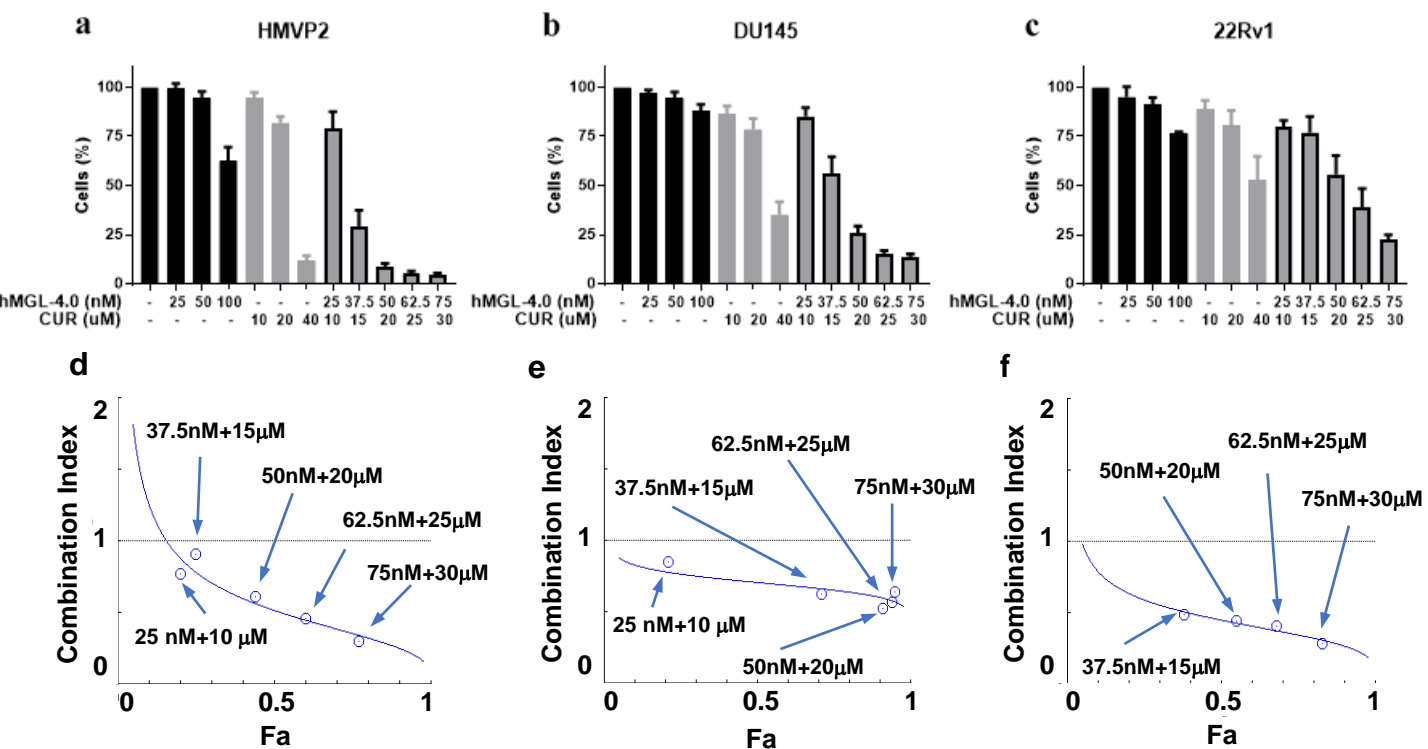

**Fig. S13. Synergistic effects of hMGL-4.0 with Curcumin.**

(a-c) Cell survival as assessed by crystal violet assay following treatment for 72 hours with indicated concentrations of hMGL-4.0, curcumin, or their combination. (d-f) combination index plot showing synergistic effects of combinations analyzed by Compusyn software for drug combinations from Combosyn, Inc. Arrows show the combinations of concentrations of Curcumin and hMGL-4.0 (First and second numbers indicate concentrations of hMGL-4.0 and curcumin, respectively)



Figure S14

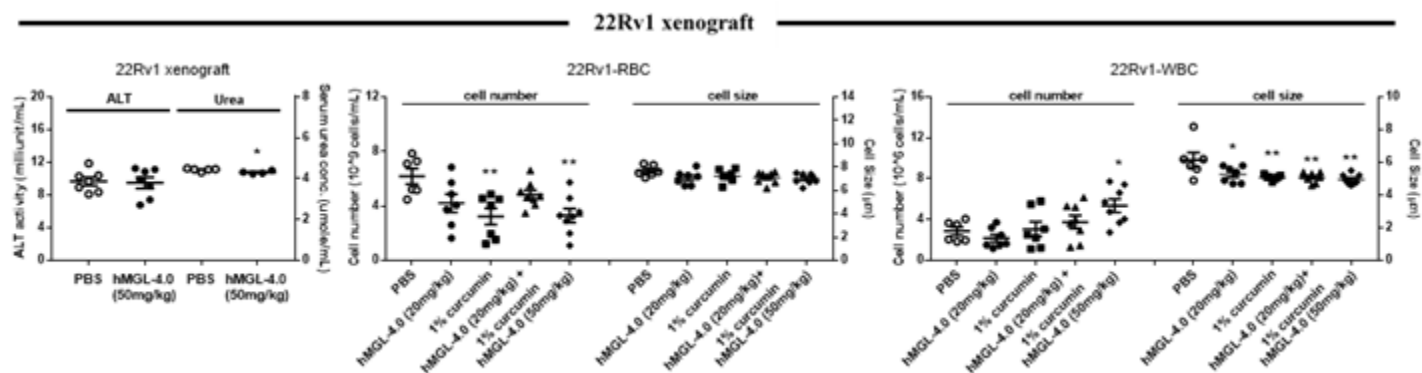

**Fig S14. Fig. S5. Toxicological assessment of mice bearing 22Rv1 tumors.**

(a) Renal function was assessed by monitoring serum urea concentrations, and liver toxicity was assessed by serum alanine transaminase (ALT) activity following termination of the 22Rv1 xenograft studies (ALT group, n = 7; urea group, n= 5 for control and n=4 for hMGL-4.0 or curcumin or combination treated groups). (b, c) Effect of hMGL-4.0 treatment on blood cell count and size, following termination of the 22Rv1 combination treatment xenograft studies: (b) red blood cell (RBC) number and size; (c) white blood cell (WBC) count and and size. Data are expressed as mean ± s.e.m.; two-sided Student's t-test (a) and one-way ANOVA followed by Bonferroni's multiple comparison test (b,c) was used for statistical analyses. \*P < 0.05; \*\*P < 0.01.

Figure S15

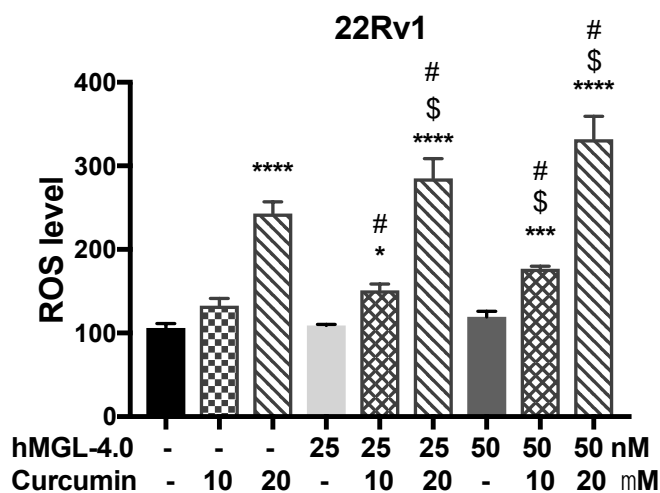

**Fig. S15. Synergistic ROS induction of hMGL-4.0 with curcumin.**

22Rv1 cells were treated with indicated concentrations of hMGL-4.0, curcumin or their combinations and cellular ROS levels were measured by 2',7'-Dichlorofluorescein diacetate (DCFDA) fluorescence 24 hr post-treatment. Data are expressed as mean  $\pm$  s.e.m.; one-way ANOVA followed by Tukey's multiple comparison test. \*P < 0.05; \*\*\*P < 0.001, \*\*\*\*P < 0.0001 compared to control. \$P < 0.05 compared to curcumin; #P < 0.05 compared to hMGL-4.0.

**Figure S16**

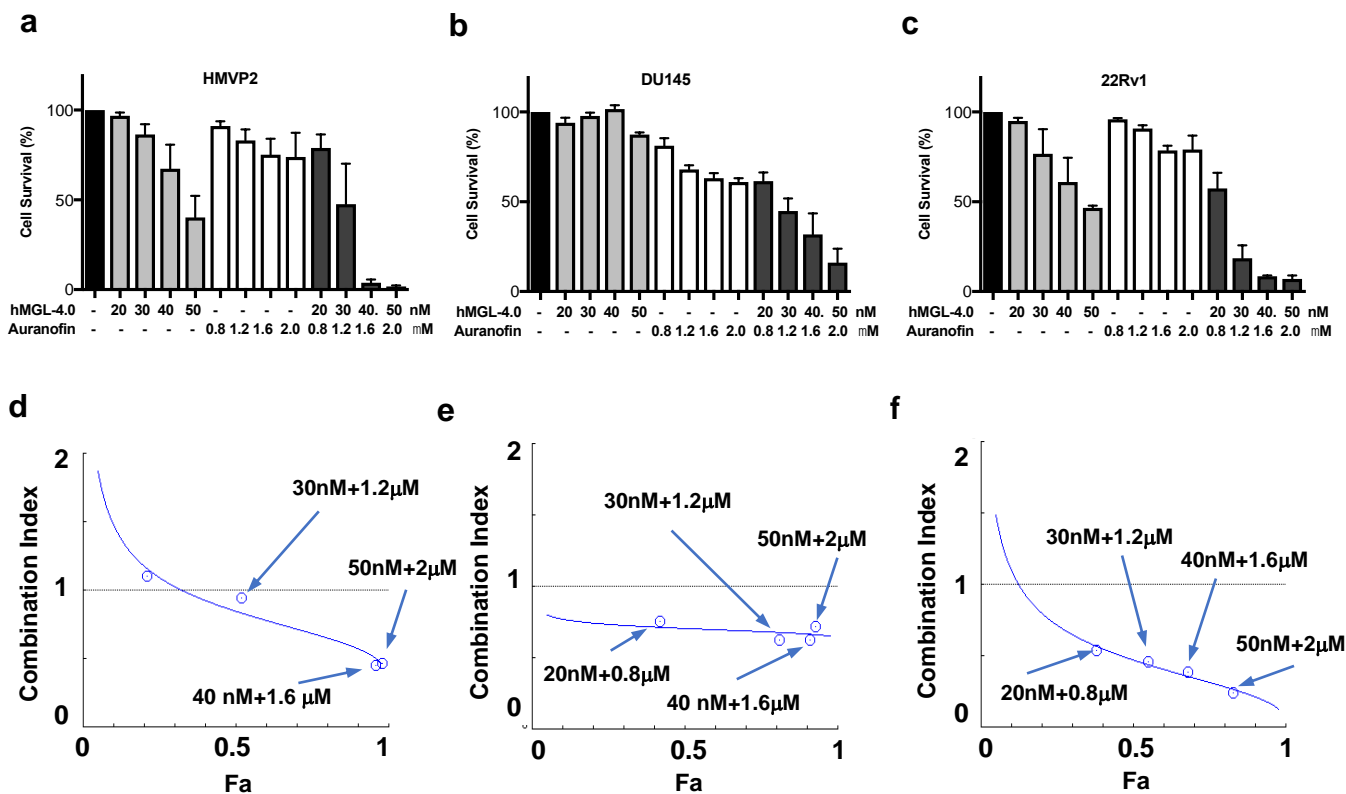

**Fig. S16. Synergistic effects of hMGL-4.0 with Auranofin.**

(a-c) Cell survival as assessed by crystal violet assays following treatment for 72 hr with indicated concentrations of hMGL-4.0, Auranofin, or their combination. (d-f) combination index plot showing synergistic effects of combinations analyzed by Compusyn software for drug combinations from Combosyn, Inc. Arrows show the combination of concentrations that produces synergy (First and second number indicates concentrations of hMGL-4.0 and Auranofin, respectively)

Figure S17

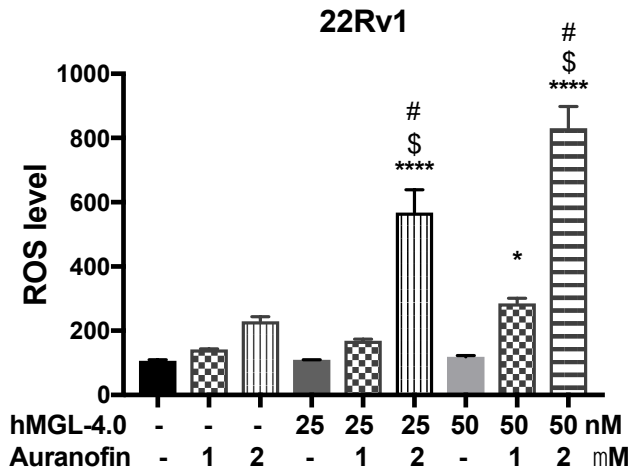

**Fig. S17. Synergistic ROS induction of hMGL-4.0 with TXNR inhibitor.**

22Rv1 cells were treated with indicated concentrations of hMGL-4.0, auranofin or their combinations and cellular ROS levels were measured by 2',7'-Dichlorofluorescein diacetate (DCFDA) fluorescence 24 hr post-treatment. Data are expressed as mean  $\pm$  s.e.m.; one-way ANOVA followed by Tukey's multiple comparison test. \* $P < 0.05$ ; \*\*\*\* $P < 0.0001$  compared to control. \$ $P < 0.0001$  compared to Auranofin; # $P < 0.0001$  compared to hMGL-4.0.
